# Supplementary material for: Pro-Inflammatory Cytokines, IFNγ and TNFα, Influence Immune Properties of Human Bone Marrow and Wharton Jelly Mesenchymal Stem Cells Differentially
Source: PLoS One. 2010 Feb 2;5(2):e9016. doi: 10.1371/journal.pone.0009016 (PMC2814860; doi:10.1371/journal.pone.0009016)
Supplement: Table S3 — MSCs from bone marrow (A) and Wharton's jelly (B) modulate the kinetics and secretion profiles of key cytokines in lymphoproliferation experiments. (0.14 MB DOC) [file pone.0009016.s003.doc]

**Table S3**

MSCs from bone marrow (A) and Wharton’s jelly (B) modulate the kinetics and secretion profiles of key cytokines in lymphoproliferation experiments

| **IFN (ng/ml)** | | | | |  |
| --- | --- | --- | --- | --- | --- |
| Time(hr) | 12 | 24 | 48 | 72 | 96 |
| **P+PHA** | 1.41±0.25 | 2.17±0.47 | 5.79±0.09 | 31.74±0.62 | 32.36±0.34 |
| **+10% C** | 1.63±0.14 | 2.49±0.49 | 15.76±1.03 | 17.19±2.20 | 20.93±3.20 |
| **+1% C** | 1.51±0.48 | 2.87±0.09 | 17.17±0.77 | 28.06±1.04 | 30.90±0.23 |
| **+10% I** | 2.32±0.49 | 2.46±0.38 | 9.28±0.77 | 8.99±1.07 | 14.37±2.38 |
| **+1% I** | 2.58±1.47 | 2.11±0.37 | 12.54±0.71 | 25.36±1.48 | 31.29±0.54 |
| **+10% T** | 1.55±0.27 | 3.04±0.33 | 5.53±0.89 | 10.72±0.99 | 13.41±1.60 |
| **+1% T** | 1.38±0.38 | 2.28±1.02 | 8.78±1.04 | 27.56±1.49 | 32.69±0.35 |

|  |  | **IL-10 (ng/ml)** | |  |  |
| --- | --- | --- | --- | --- | --- |
| Time(hr) | 12 | 24 | 48 | 72 | 96 |
| **P+PHA** | 0.62±0.21 | 0.40±0.32 | 1.05±0.71 | 0.67±0.39 | 2.98±0.47 |
| **+10% C** | 0.85±0.05 | 0.77±0.66 | 1.77±0.60 | 1.78±0.19 | 3.95±0.03 |
| **+1% C** | 0.89±0.31 | 1.28±0.05 | 1.50±0.59 | 1.41±021 | 0.02±0.03 |
| **+10% I** | 0.45±0.14 | 2.49±0.34 | 2.88±0.27 | 2.24±0.58 | 0.02±0.03 |
| **+1% I** | 0.70±0.44 | 1.14±0.06 | 1.54±0.23 | 1.18±0.18 | 0.03±0.06 |
| **+10% T** | 1.35±0.49 | 2.58±0.20 | 2.91±0.49 | 3.59±1.03 | 0.01±0.02 |
| **+1% T** | 0.50±0.12 | 1.35±0.08 | 1.52±0.30 | 1.12±0.44 | 0.02±0.03 |

|  |  |  | **IL2(ng/ml)** |  |  |
| --- | --- | --- | --- | --- | --- |
| Time (hr) | 12 | 24 | 48 | 72 | 96 |
| **P+P** | 0.39±0.02 | 0.24±0.02 | 0.52±0.07 | 0.35±0.01 | 0.03±0.01 |
| **+10% C** | 0.52±0.05 | 0.30±0.02 | 0.16±0.02 | 0.03±0.01 | 0.01±0.03 |
| **+1% C** | 0.43±0.02 | 0.23±0.01 | 0.24±0.05 | 0.13±0.02 | 0.01±0.01 |
| **+10% I** | 0.40±0.05 | 0.26±0.01 | 0.14±0.02 | 0.03±0.01 | ND |
| **+1% I** | 0.41±0.05 | 0.19±0.01 | 0.23±0.06 | 0.13±0.01 | 0.01±0.01 |
| **+10% T** | 0.50±0.01 | 0.26±0.02 | 0.14±0.02 | 0.03±0.01 | ND |
| **+1% T** | 0.46±0.02 | 0.23±0.00 | 0.37±0.04 | 0.22±0.01 | 0.05±0.01 |

|  |  | **IL-2sR(ng/ml)** | |  |  |
| --- | --- | --- | --- | --- | --- |
| Time(hr) | 12 | 24 | 48 | 72 | 96 |
| **P+P** | 0.21±0.01 | 0.54±0.02 | 1.64±0.09 | 1.56±0.20 | 3.84±0.01 |
| **+10% C** | 0.42±0.06 | 0.60±0.03 | 2.39±0.08 | 2.14±0.40 | 3.79±0.04 |
| **+1% C** | 0.29±0.10 | 0.39±0.34 | 2.20±0.14 | 2.09±0.31 | 3.74±0.10 |
| **+10% I** | 0.48±0.11 | 0.67±0.07 | 2.44±0.16 | 2.47±0.33 | 3.64±0.21 |
| **+1% I** | 0.43±0.09 | 0.36±0.14 | 2.02±0.23 | 2.74±0.44 | 3.89±0.02 |
| **+10% T** | 0.40±0.10 | 0.62±0.09 | 2.38±0.24 | 3.26±0.35 | 3.56±0.33 |
| **+1% T** | 0.40±0.07 | 0.50±0.04 | 1.72±0.16 | 2.90±0.08 | 2.98±1.52 |

|  | **TNF(ng/ml)** | | | | |
| --- | --- | --- | --- | --- | --- |
| Time (hr) | 12 | 24 | 48 | 72 | 96 |
| **P+P** | 1.24±0.03 | 0.87±0.05 | 0.91±0.06 | 0.62±0.02 | 0.71±0.02 |
| **+10% C** | 0.65±0.02 | 0.22±0.00 | 0.24±0.01 | 0.08±0.01 | 0.26±0.01 |
| **+1% C** | 1.41±0.06 | 0.65±0.00 | 0.39±0.06 | 0.48±0.00 | 0.72±0.00 |
| **+10% I** | 1.37±0.35 | 0.20±0.02 | 0.19±0.01 | 0.09±0.00 | 0.18±0.01 |
| **+1% I** | 1.23±0.13 | 0.39±0.00 | 0.60±0.04 | 0.50±0.01 | 0.81±0.06 |
| **+10% T** | 0.56±0.01 | 0.12±0.01 | 0.10±0.00 | 0.07±0.00 | 0.08±0.00 |
| **+1% T** | 1.46±0.25 | 0.37±0.04 | 0.95±0.07 | 0.55±0.02 | 0.83±0.02 |
|  |  |  |  |  |  |

**(B)**

| **IFN(ng/ml)** | | | | |  |
| --- | --- | --- | --- | --- | --- |
| Time (hr) | 12 | 24 | 48 | 72 | 96 |
| **P+P** | 0.01±0.13 | 0.16±0.11 | 0.62±0.06 | 4.56±1.12 | 8.07±0.90 |
| **+10% C** | 0.06±0.15 | 0.33±0.26 | 1.52±0.40 | 2.21±0.60 | 1.76±0.67 |
| **+1% C** | 0.01±0.19 | 0.19±0.05 | 3.04±0.07 | 4.21±1.24 | 3.73±0.52 |
| **+10% I** | 0.03±0.22 | 0.01±0.01 | 1.05±0.33 | 2.42±0.38 | 0.39±0.05 |
| **+1% I** | 0.09±0.21 | 0.10±0.00 | 1.62±0.09 | 5.19±0.41 | 2.11±0.09 |
| **+10% T** | 0.10±0.29 | 0.46±0.30 | 1.45±0.59 | 2.17±0.47 | 1.22±0.05 |
| **+1% T** | 0.16±0.11 | 0.32±0.14 | 2.45±0.61 | 2.72±1.32 | 5.65±0.44 |

|  |  | **IL-10(ng/ml)** | |  |  |
| --- | --- | --- | --- | --- | --- |
| **Time (hr)** | **12** | **24** | **48** | **72** | **96** |
| **P+P** | 0.24±0.02 | 0.78±0.13 | 1.55±0.05 | 0.88±0.03 | 0.99±0.05 |
| **+10% C** | 0.66±0.04 | 1.61±0.06 | 1.14±0.05 | 0.73±0.06 | 1.21±0.10 |
| **+1% C** | 0.23±0.04 | 1.23±0.07 | 1.23±0.05 | 1.02±0.02 | 0.69±0.06 |
| **+10% I** | 0.75±0.01 | 1.41±0.26 | 1.02±0.03 | 0.93±0.05 | 0.67±0.03 |
| **+1% I** | 0.33±0.03 | 1.04±0.05 | 1.15±0.02 | 0.75±0.03 | 0.76±0.01 |
| **+10% T** | 0.44±0.04 | 1.63±0.03 | 1.53±0.05 | 1.13±0.06 | 0.79±0.04 |
| **+1% T** | 0.21±0.02 | 1.03±0.00 | 1.17±0.07 | 0.77±0.03 | 0.66±0.06 |

|  | **IL-2(pg/ml)** | | | | |
| --- | --- | --- | --- | --- | --- |
| Time(hr) | 12 | 24 | 48 | 72 | 96 |
| **P+P** | 92.44±1.74 | 93.32±6.17 | 144.56±0.97 | 23.45±2.20 | 10.25±0.86 |
| **+10% C** | 62.11±1.83 | 107.02±9.44 | 134.63±2.49 | 17.23±1.27 | 10.36±0.28 |
| **+1% C** | 69.94±0.02 | 113.96±9.72 | 114.86±4.81 | 35.00±1.61 | 10.38±0.51 |
| **+10% I** | 89.80±6.04 | 119.44±4.66 | 116.31±5.99 | 13.36±0.23 | 9.19±0.81 |
| **+1% I** | 60.49±2.26 | 106.36±3.99 | 135.50±0.03 | 28.68±0.52 | 8.84±0.15 |
| **+10% T** | 126.55±1.02 | 190.88±11.15 | 206.36±13.05 | 86.25±6.56 | 8.64±0.01 |
| **+1% T** | 88.55±5.99 | 131.48±9.78 | 140.68±11.08 | 25.88±1.31 | 12.20±1.73 |

|  |  | **IL2-sR(ng/ml)** | |  |  |
| --- | --- | --- | --- | --- | --- |
| Time(hr) | 12 | 24 | 48 | 72 | 96 |
| **P+P** | ND | 0.09±0.00 | 0.81±0.10 | 3.08±0.23 | 5.51±0.27 |
| **+10% C** | ND | 0.35±0.04 | 4.52±0.02 | 3.27±0.57 | 5.19±0.32 |
| **+1% C** | ND | 0.21±0.04 | 0.98±0.24 | 3.27±0.41 | 5.21±0.29 |
| **+10% I** | ND | 0.17±0.09 | 2.55±0.46 | 3.08±0.98 | 6.05±0.40 |
| **+1% I** | ND | 0.17±0.06 | 1.53±0.34 | 3.48±0.81 | 5.18±0.59 |
| **+10% T** | ND | 0.27±0.02 | 1.07±0.11 | 5.12±0.59 | 5.77±0.07 |
| **+1% T** | ND | 0.22±0.08 | 0.95±0.07 | 2.98±0.25 | 5.96±0.32 |

|  |  | **TNF- α(ng/ml)** | |  |  |
| --- | --- | --- | --- | --- | --- |
| Time (hr) | 12 | 24 | 48 | 72 | 96 |
| **P+P** | 1.34±0.22 | 1.36±0.03 | 0.37±0.01 | 0.32±0.03 | 0.26±0.00 |
| **+10% C** | 0.47±0.02 | 0.21±0.00 | 0.05±0.01 | 0.02±0.00 | 0.04±0.00 |
| **+1% C** | 2.16±0.02 | 1.05±0.06 | 0.48±0.02 | 0.33±0.01 | 0.33±0.01 |
| **+10% I** | 0.51±0.02 | 0.15±0.00 | 0.08±0.06 | 0.04±0.00 | 0.03±0.00 |
| **+1% I** | 2.10±0.04 | 1.20±0.01 | 0.39±0.02 | 0.30±0.02 | 0.26±0.01 |
| **+10% T** | 1.42±0.01 | 0.57±0.02 | 0.22±0.01 | 0.10±0.00 | 0.07±0.01 |
| **+1% T** | 2.17±0.02 | 1.60±0.03 | 0.60±0.01 | 0.66±0.01 | 0.17±0.01 |

PBMCs were stimulated with PHA in the presence of different doses of either bone marrow (A) or Wharton’s jelly derived MSCs (B) which were either unprimed or primed with IFN (I) or TNF(T) for different time intervals as indicated in the table. Cell supernatants were collected after defined time intervals and levels of secreted cytokines in different co-culture conditions were measured by specific BD OptiELISA kits. Each experiment was set up in triplicates. “+” indicates co-cultures of PHA stimulated PBMCs with appropriately treated MSCs as mentioned above. ND refers to not detected.
